# Supplementary material for: Ultrasensitive negative capacitance phototransistors
Source: PubMed Central journal article supplement (PMC6941953; doi:10.1038/s41467-019-13769-z), 2020-01-03
Supplement: 41467_2019_13769_MOESM1_ESM.pdf [file 41467_2019_13769_MOESM1_ESM.pdf]

**Supplementary Information for  
Ultrasensitive Negative Capacitance Phototransistors**

Tu et al.

## Supplementary Figure 1

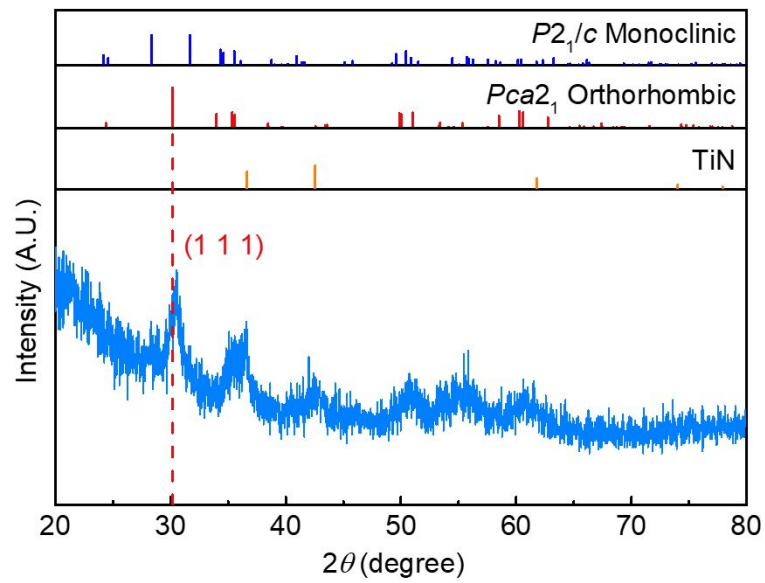

**Supplementary Fig. 1 | GI-XRD pattern of the ferroelectric HZO film.** The grazing-incident X-ray diffraction (GI-XRD) pattern of the 10 nm-thick HZO thin film at an incident angle of  $1^\circ$  is well matched with the ferroelectric orthorhombic phase  $Pca2_1$  (with the highest peak at  $30.2^\circ$  corresponding to the  $111_o$  reflection)<sup>1-3</sup>.

## Supplementary Figure 2

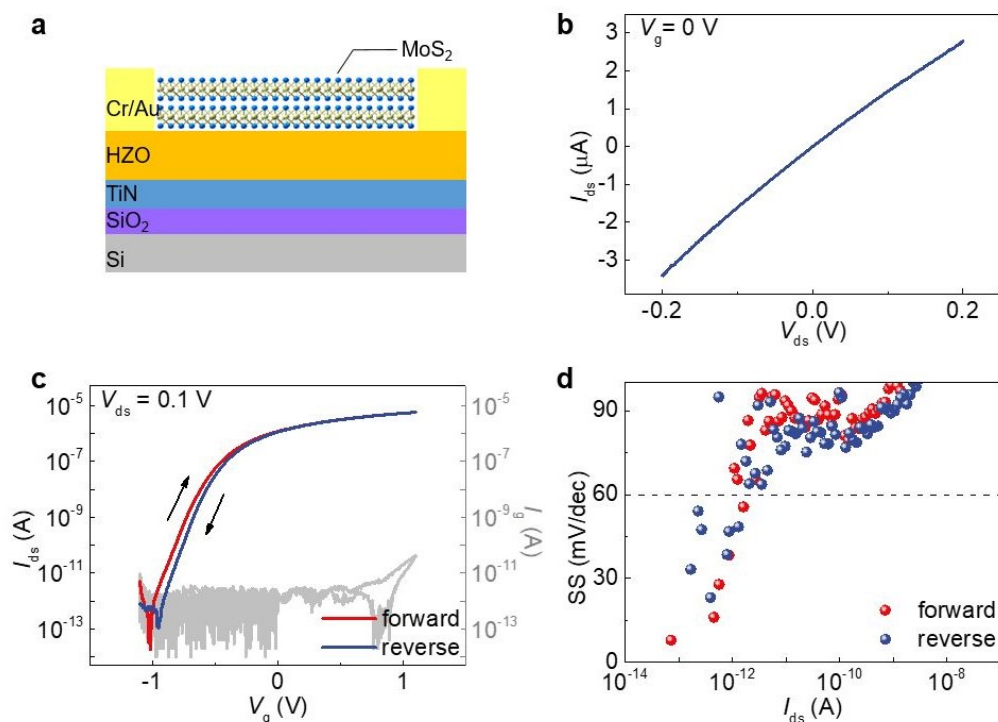

**Supplementary Fig. 2 | Device schematic and electrical properties of MFSFETs. a**, Device schematic of a metal-ferroelectric-semiconductor field effect transistor (MFSFET). **b**, Output characteristic ( $V_{ds}$ - $I_{ds}$ ) curve exhibits ohmic characteristics. **c**, Forward and reverse transfer characteristic ( $V_g$ - $I_{ds}$ ) curves are plotted in red and blue respectively. **d**, SS is calculated according to the transfer characteristic curves.

The comparison results of the electronic properties between the MFSFET and the MFISFET are listed as follows: 1) As the gate voltage sweeps from negative to positive and then to negative, the  $V_g$ - $I_{ds}$  curve of the MFSFET exhibits a clockwise hysteresis, while the MFISFET is almost non-hysteresis. This phenomenon is due to the higher interface defect density in the HZO/MoS<sub>2</sub> interface of the MFSFET without an Al<sub>2</sub>O<sub>3</sub> buffer layer. 2) The MFSFET without the Al<sub>2</sub>O<sub>3</sub> layer presents the higher SS than the MFISFET (the MFISFET presents the sub-60 mV/dec SS over three orders of magnitude in drain current, while that is over just one order of magnitude in the MFSFET). In addition, when the gate voltage  $V_g$  is more than 1V, the gate of the MFSFET has a more obvious leakage trend than the MFISFET.

### Supplementary Figure 3

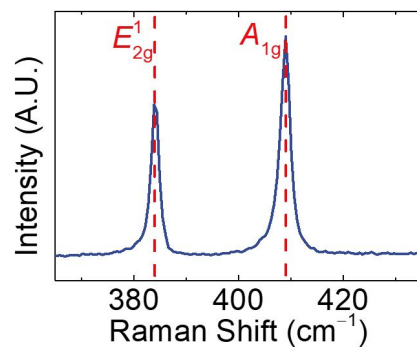

**Supplementary Fig. 3 | Raman spectrum of the 9-layer MoS<sub>2</sub> flake.** Raman spectrum of the 9-layer MoS<sub>2</sub> flake with peaks at Raman frequencies of 383.87 cm<sup>-1</sup> ( $E_{2g}^1$ ) and 408.97 cm<sup>-1</sup> ( $A_{1g}$ ).

## Supplementary Figure 4

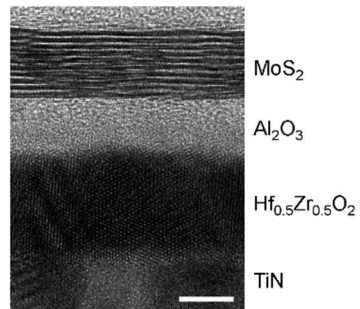

**Supplementary Fig. 4 | High-resolution TEM imaging of the device.** High-resolution cross-sectional transmission electron microscopy (TEM) imaging of the device, where the layered structure of the MoS<sub>2</sub> flake is discerned. Scale bar, 5 nm.

## Supplementary Figure 5

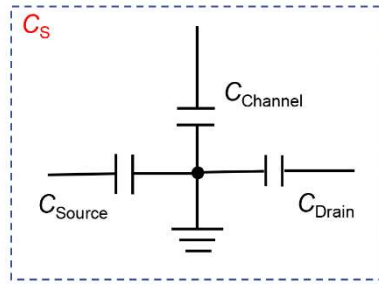

**Supplementary Fig. 5 | Equivalent capacitance schematic.** Semiconductor capacitance ( $C_s$ ) includes capacitance of MoS<sub>2</sub> as well as stray capacitances of the source and drain ( $C_{\text{Source}}$  and  $C_{\text{Drain}}$ ).

## Supplementary Figure 6

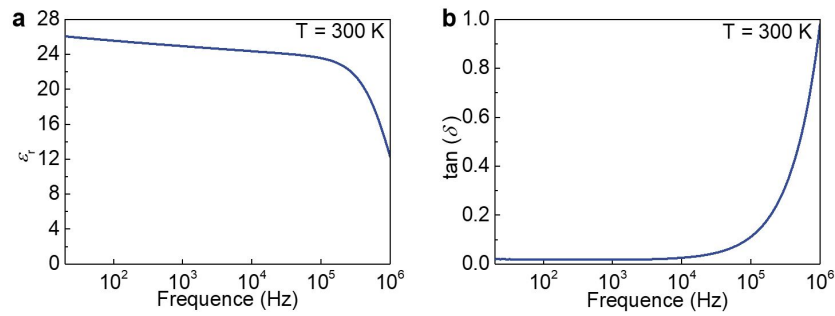

**Supplementary Fig. 6 | Relative permittivity and dielectric loss of the ferroelectric HZO film.** Capacitance of the ferroelectric HZO film ( $C_{\text{Fe}}$ ) is calculated by  $C_{\text{Fe}} = \epsilon_{\text{Fe}} S d_{\text{Fe}}^{-1}$ , where  $\epsilon_{\text{Fe}}$ ,  $S$  and  $d_{\text{Fe}}$  stand for the permittivity, area and thickness of the ferroelectric HZO film. **a**, Relative permittivity ( $\epsilon_r$ ) and **b**, dielectric loss of the ferroelectric HZO film are measured by a capacitor composed of Au/HZO/TiN layers.

## Supplementary Figure 7

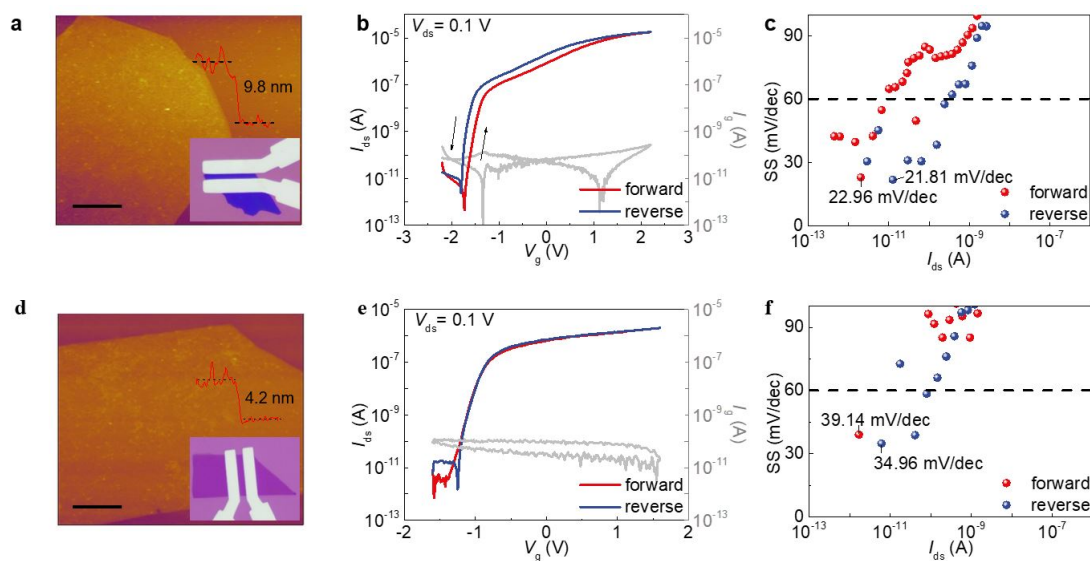

**Supplementary Fig. 7 | Electrical properties of MFISFETs with various MoS<sub>2</sub> thicknesses.** For a 9.8 nm-thick MoS<sub>2</sub> flake, **a**, AFM imaging of the MoS<sub>2</sub> flake, and the inset is the optical microscope photograph of the device. **b**, a hysteresis about 0.16 V between forward and reverse transfer characteristic ( $V_g$ - $I_{ds}$ ) curves is observed. **c**, SS is calculated according to  $V_g$ - $I_{ds}$  curves, where minimum values in forward and reverse are 22.96 and 21.81 mV/dec. For a 4.2 nm-thick MoS<sub>2</sub> flake, **d**, AFM imaging of the MoS<sub>2</sub> flake and optical microscope photograph of the device. **e**, Hysteresis between forward and reverse transfer characteristic curves is nearly disappeared. **f**, Minimum SS in forward and reverse are 39.14 and 34.96 mV/dec.



## Supplementary Figure 8

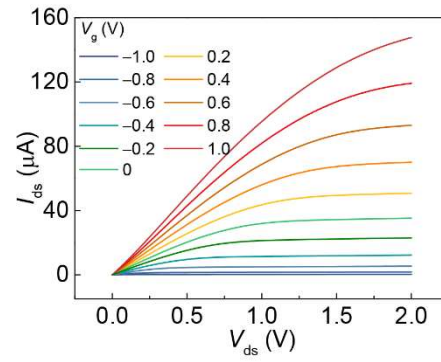

**Supplementary Fig. 8 | Output characteristics of the MFISFET.** Output characteristic ( $V_{ds}$ - $I_{ds}$ ) curves under the maximum drain voltage to 2.0 V for  $V_g$  from -1.0 to 1.0 V.

## Supplementary Figure 9

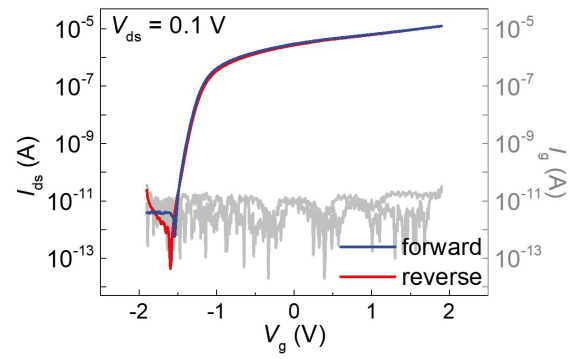

**Supplementary Fig. 9 | Gate leakage measurement of the MFISFET.** The gate leakage current  $I_g$  is well suppressed, which demonstrates that the device is not driven by a leakage behavior.

# Supplementary Table 1

| Strategy                                                         | Device type                                                                    | Active layer                                                                                             | $I_{ph}/I_{dark}$          | $R$<br>( $\text{AW}^{-1}$ ) | $D^+$<br>( $\text{cmHz}^{1/2}\text{W}^{-1}$ ) | Response time                             | Operating voltage                                    | Year             | Ref.             |
|------------------------------------------------------------------|--------------------------------------------------------------------------------|----------------------------------------------------------------------------------------------------------|----------------------------|-----------------------------|-----------------------------------------------|-------------------------------------------|------------------------------------------------------|------------------|------------------|
| Pristine phototransistors                                        | Pristine phototransistors based on mechanically exfoliated $\text{MoS}_2$      | Mechanically exfoliated 1L                                                                               | 10                         | $7.5 \times 10^{-3}$        | -                                             | $T_r = 50$ ms<br>$T_f = 50$ ms            | $V_{ds} = 1.0$ V<br>$V_g = 50$ V                     | 2011             | [4]              |
|                                                                  |                                                                                | Mechanically exfoliated ML (UV-visible-NIR)                                                              | $< 10^3$                   | 0.12                        | $10^{10}$ - $10^{11}$                         | -                                         | $V_{ds} = 1.0$ V<br>$V_g = -3.0$ V                   | 2012             | [5]              |
|                                                                  |                                                                                | Mechanically exfoliated 1L                                                                               | 30                         | 880                         | -                                             | $T_r = 4$ s<br>$T_f = 9$ s                | $V_{ds} = 8.0$ V<br>$V_g = -70$ V                    | 2013             | [6]              |
|                                                                  | Pristine phototransistors based on CVD-grown $\text{MoS}_2$                    | CVD-grown 1L (in vacuum)                                                                                 | $10^4$                     | $2.2 \times 10^3$           | -                                             | 220 s                                     | $V_{ds} = 1.0$ V<br>$V_g - V_{th} = 100$ V           | 2013             | [7]              |
|                                                                  |                                                                                | CVD-grown FL                                                                                             | $10^2$                     | 0.57                        | $10^{10}$                                     | $T_r = 70$ $\mu$ s<br>$T_f = 110$ $\mu$ s | $V_{ds} = 10$ V                                      | 2013             | [8]              |
|                                                                  |                                                                                | CVD-grown 1L                                                                                             | $10^4$                     | $1.1 \times 10^{-3}$        | -                                             | $> 1$ s                                   | $V_{ds} = 1.5$ V<br>$V_g = -3.0$ V                   | 2014             | [9]              |
|                                                                  | Pristine phototransistors of $\text{MoS}_2$ based on other preparation methods | Self-limiting grown FL (after laser micromachining)                                                      | -                          | 0.55                        | -                                             | $T_r = 200$ $\mu$ s<br>$T_f = 1.7$ ms     | $V_{ds} = 3.0$ V<br>$V_g = 0$ V                      | 2014             | [10]             |
|                                                                  |                                                                                | Magnetron sputtered 5L                                                                                   | -                          | 1.8                         | $5 \times 10^8$                               | $T_r = 0.3$ s<br>$T_f = 0.36$ s           | $V_{ds} = 5.0$ V                                     | 2015             | [11]             |
|                                                                  |                                                                                | Solution-synthesized 2-4L                                                                                | $10^2$                     | $6.3 \times 10^{-5}$        | $4.2 \times 10^8$                             | 20 ms                                     | $V_{ds} = 10$ V<br>$V_g = 0$ V                       | 2016             | [12]             |
|                                                                  | Surface plasmon enhancement                                                    | Phototransistors with Au nanostructure arrays                                                            | Mechanically exfoliated FL | $< 10$                      | -                                             | -                                         | -                                                    | $V_{ds} = 1.0$ V | 2015             |
| Phototransistors with Au Schottky junction                       |                                                                                | Mechanically exfoliated ML                                                                               | $10^3$ - $10^5$            | 26.9                        | $6 \times 10^{10}$                            | $T_r = 645$ ms<br>$T_f = 584$ ms          | $V_{ds} = 1.0$ V<br>$V_g = -20$ V                    | 2019             | [14]             |
| Charge-transfer assistance                                       | $\text{MoS}_2$ - QDs phototransistors                                          | FL $\text{MoS}_2$ - PbS QDs (Visible-NIR)                                                                | $< 10$                     | $6 \times 10^5$             | $5 \times 10^{11}$                            | $T_r = 350$ ms                            | $V_{ds} = 1.0$ V<br>$V_g = -60$ V                    | 2014             | [15]             |
|                                                                  |                                                                                | FL $\text{MoS}_2$ - PbSe QDs (NIR)                                                                       | -                          | $1.9 \times 10^{-5}$        | -                                             | $T_r = 250$ ms<br>$T_f = 430$ ms          | $V_{ds} = 14$ V                                      | 2014             | [16]             |
|                                                                  |                                                                                | ML $\text{MoS}_2$ - Gr QDs                                                                               | -                          | $1.6 \times 10^4$           | -                                             | $T_r = 1.23$ s<br>$T_f = 10.97$ s         | $V_{ds} = 1.0$ V<br>$V_g = 80$ V                     | 2015             | [17]             |
|                                                                  |                                                                                | $\text{MoS}_2$ - HgTe QDs                                                                                | -                          | $10^6$                      | -                                             | -                                         | $V_{ds} = 1.0$ V<br>$V_g = 0$ V                      | 2017             | [18]             |
|                                                                  | $\text{MoS}_2$ - organic molecules phototransistors                            | 1L $\text{MoS}_2$ - rhodamine 6G (Visible-NIR)                                                           | $< 10$                     | 1.17                        | $1.5 \times 10^7$                             | $T_r = 5.1$ $\mu$ s<br>$T_f = 2.3$ s      | $V_{ds} = 5.0$ V<br>$V_g = 0$ V                      | 2014             | [19]             |
|                                                                  |                                                                                | 1L $\text{MoS}_2$ - ZnPc molecules                                                                       | -                          | 430                         | -                                             | $< 8$ ms                                  | $V_{ds} = 1.6$ V<br>$V_g = 40$ V                     | 2018             | [20]             |
|                                                                  | $\text{MoS}_2$ - perovskite phototransistors                                   | Solution-processed $\text{MoS}_2$ - $\text{CH}_3\text{NH}_3\text{PbI}_3$ perovskite                      | -                          | $10^3$                      | $2.6 \times 10^{11}$                          | $T_r = 25$ ms<br>$T_f = 50$ ms            | $V_{ds} = 2.0$ V                                     | 2016             | [21]             |
|                                                                  |                                                                                | APTES doped FL $\text{MoS}_2$ - $\text{CH}_3\text{NH}_3\text{PbI}_3$ perovskite                          | 10                         | $2.11 \times 10^4$          | $1.38 \times 10^{10}$                         | $T_r = 10.7$ s<br>$T_f = 6.0$ s           | $V_{ds} = 5.0$ V<br>$V_g = 20$ V                     | 2016             | [22]             |
|                                                                  | $\text{MoS}_2$ - Gr phototransistors                                           | ML $\text{MoS}_2$ - 1L Gr                                                                                | 25                         | $5 \times 10^8$             | -                                             | Tens of seconds                           | $V_{ds} = 0.1$ V<br>$V_g = -50$ V                    | 2013             | [23]             |
|                                                                  |                                                                                | 1L $\text{MoS}_2$ - 1L Gr                                                                                | $< 10$                     | $1.2 \times 10^7$           | -                                             | Hundreds of seconds                       | $V_{ds} = 1.0$ V<br>$V_g = -10$ V                    | 2014             | [24]             |
| FL $\text{MoS}_2$ - 1L Gr                                        |                                                                                | $< 10$                                                                                                   | 10                         | -                           | $T_r = 0.28$ s<br>$T_f = 1.5$ s               | $V_{ds} = 0.1$ V<br>$V_g = 0$ V           | 2014                                                 | [25]             |                  |
| FL $\text{MoS}_2$ - 1L Gr (at zero bias)                         |                                                                                | 1428                                                                                                     | 3.0                        | -                           | 0.13 ms                                       | $V_{ds} = 0$ V                            | 2015                                                 | [26]             |                  |
| Impurity engineering / energy band engineering of $\text{MoS}_2$ | Phototransistors based on doped $\text{MoS}_2$                                 | APTES doped FL $\text{MoS}_2$                                                                            | 10                         | $4.75 \times 10^3$          | $4.47 \times 10^9$                            | -                                         | $V_{ds} = 5.0$ V<br>$V_g - V_{th} = 4.0$ V           | 2015             | [27]             |
|                                                                  |                                                                                | chemically in-situ n-type doped CVD $\text{MoS}_2$                                                       | -                          | 99.9                        | $9.4 \times 10^{12}$                          | $T_r = 16.6$ s<br>$T_f = 5.2$ s           | $V_{ds} = 0.1$ V<br>$V_g = 0$ V                      | 2019             | [28]             |
|                                                                  | Phototransistors based on energy band engineering of $\text{MoS}_2$            | $\text{MoS}_2$ controlled by radiation pluses                                                            | -                          | 0.0507                      | $1.55 \times 10^9$                            | -                                         | $V_{ds} = 10$ V<br>$V_g = -15$ V                     | 2017             | [29]             |
| Gate engineering                                                 | Phototransistors with local bottom-gate structures                             | Mechanically exfoliated ML                                                                               | $\sim 10^3$                | 342.6                       | -                                             | $> 1$ s                                   | $V_{ds} = 1.0$ V<br>$V_g = 8.0$ V                    | 2015             | [30]             |
|                                                                  |                                                                                | 1-2L (HfO <sub>2</sub> encapsulation)                                                                    | $\sim 10^3$                | $10^4$                      | $7.7 \times 10^{11}$                          | 10 s                                      | $V_{ds} = 1.0$ V<br>$V_g = -40$ V                    | 2015             | [31]             |
|                                                                  | Phototransistors based on gate dielectric engineering                          | 3L (driven by PVDF-TrFE)                                                                                 | $10^3$                     | $2.57 \times 10^3$          | $2.2 \times 10^{12}$                          | $T_r = 1.8$ ms<br>$T_f = 2.0$ ms          | $V_{ds} = 5.0$ V<br>pre-polarized with $V_g = -40$ V | 2015             | [32]             |
|                                                                  |                                                                                | ML (inserting a TiO <sub>2</sub> interlayer)                                                             | $> 10$                     | 9                           | -                                             | $< 1$ s                                   | $V_{ds} = -1.0$ V                                    | 2017             | [33]             |
|                                                                  |                                                                                | ML $\text{MoS}_2$ (Hf <sub>0.5</sub> Zr <sub>0.5</sub> O <sub>2</sub> ferroelectric NC phototransistors) | $3 \times 10^9$            | $10^2$                      | $4.7 \times 10^{14}$                          | $T_r = 400$ $\mu$ s<br>$T_f = 200$ ms     | $V_{ds} = 0.5$ V<br>$V_g = -1.6$ V                   | 2019             | <b>This work</b> |

**Supplementary Table. 1 | Optimization strategy and performance summary of reported  $\text{MoS}_2$  phototransistors.** ML: multilayer, FL: few-layer, CVD: chemical vapor deposition, NC: negative capacitance, QDs: quantum dots, Gr: graphene.

## Supplementary References

- [1] Muller J, et al. Ferroelectricity in simple binary  $ZrO_2$  and  $HfO_2$ . *Nano Lett.* **12**, 4318-4323 (2012).
- [2] Huan T D, et al. Pathways towards ferroelectricity in hafnia. *Phys. Rev. B* **99**, 064111 (2014).
- [3] Sang X, et al. On the structural origins of ferroelectricity in  $HfO_2$  thin films. *Appl. Phys. Lett.* **106**, 162905 (2015).
- [4] Yin, Z. et al. Single-layer  $MoS_2$  phototransistors. *ACS nano* **6**, 74-80 (2011).
- [5] Choi, W. et al. High-detectivity multilayer  $MoS_2$  phototransistors with spectral response from ultraviolet to infrared. *Adv. Mater.* **24**, 5832-5836 (2012).
- [6] Lopez-Sanchez, O., Lembke, D., Kayci, M., Radenovic, A., Kis, A. Ultrasensitive photodetectors based on monolayer  $MoS_2$ . *Nat. Nanotechnol.* **8**, 497 (2013).
- [7] Zhang, W., Huang, J. K., Chen, C. H., Chang, Y. H., Cheng, Y. J., Li, L. J. High-gain phototransistors based on a CVD  $MoS_2$  monolayer. *Adv. Mater.* **25**, 3456-3461 (2013).
- [8] Tsai, D. S. et al. Few-layer  $MoS_2$  with high broadband photogain and fast optical switching for use in harsh environments. *ACS nano* **7**, 3905-3911 (2013).
- [9] Perea-López, N. et al. CVD-grown monolayered  $MoS_2$  as an effective photosensor operating at low-voltage. *2D Mater.* **1**, 011004 (2014).
- [10] Lu, J. et al. Improved photoelectrical properties of  $MoS_2$  films after laser micromachining. *ACS nano* **8**, 6334-6343 (2014).
- [11] Ling, Z. P. et al. Large-scale two-dimensional  $MoS_2$  photodetectors by magnetron sputtering. *Opt. express* **23**, 13580-13586 (2015).
- [12] Lee, Y., Yang, J., Lee, D., Kim, Y. H., Park, J. H., Kim, H., Cho, J. H. Trap-induced photoresponse of solution-synthesized  $MoS_2$ . *Nanoscale* **8**, 9193-9200 (2016).
- [13] Miao, J. et al. Surface plasmon-enhanced photodetection in few layer  $MoS_2$  phototransistors with Au nanostructure arrays. *Small* **11**, 2392-2398 (2015).
- [14] Lee, S., Park, J., Yun, Y., Lee, J., Heo, J. Enhanced photoresponsivity of multilayer  $MoS_2$  phototransistor using localized Au schottky junction formed by spherical-lens

- photolithography. *Adv. Mater. interfaces* **6**, 1900053 (2019).
- [15] Kufer, D., Nikitskiy, I., Lasanta, T., Navickaite, G., Koppens, F. H., Konstantatos, G. Hybrid 2D-0D MoS<sub>2</sub>-PbS quantum dot photodetectors. *Adv. Mater.* **27**, 176-180 (2015).
- [16] Schornbaum, J. et al. Epitaxial Growth of PbSe Quantum Dots on MoS<sub>2</sub> Nanosheets and their Near-Infrared Photoresponse. *Adv. Funct. Mater.* **24**, 5798-5806 (2014).
- [17] Chen, C. et al. Highly responsive MoS<sub>2</sub> photodetectors enhanced by graphene quantum dots. *Sci. Rep.* **5**, 11830 (2015).
- [18] Huo, N., Gupta, S., Konstantatos, G. MoS<sub>2</sub>-HgTe quantum dot hybrid photodetectors beyond 2 μm. *Adv. Mater.* **29**, 1606576 (2017).
- [19] Yu, S. H. et al. Dye-sensitized MoS<sub>2</sub> photodetector with enhanced spectral photoresponse. *ACS nano* **8**, 8285-8291 (2014).
- [20] Huang, Y. et al. Van der Waals coupled organic molecules with monolayer MoS<sub>2</sub> for fast response photodetectors with gate-tunable responsivity. *ACS nano* **12**, 4062-4073 (2018).
- [21] Wang, Y. et al. Solution-Processed MoS<sub>2</sub>/Organolead Trihalide Perovskite Photodetectors. *Adv. Mater.* **29**, 1603995 (2017).
- [22] Kang, D. H. et al. An Ultrahigh-Performance Photodetector based on a Perovskite-Transition-Metal-Dichalcogenide Hybrid Structure. *Adv. Mater.* **28**, 7799-7806 (2016).
- [23] Roy, K., Padmanabhan, M., Goswami, S., Sai, T. P., Ramalingam, G., Raghavan, S., Ghosh, A. Graphene-MoS<sub>2</sub> hybrid structures for multifunctional photoresponsive memory devices. *Nat. Nanotechnol.* **8**, 826 (2013).
- [24] Zhang, W. et al. Ultrahigh-gain photodetectors based on atomically thin graphene-MoS<sub>2</sub> heterostructures. *Sci. Rep* **4**, 3826 (2014).
- [25] Xu, H., Wu, J., Feng, Q., Mao, N., Wang, C., Zhang, J. High responsivity and gate tunable graphene-MoS<sub>2</sub> hybrid phototransistor. *Small* **10**, 2300-2306 (2014).
- [26] Li, X., Wu, J., Mao, N., Zhang, J., Lei, Z., Liu, Z., Xu, H. A self-powered graphene-MoS<sub>2</sub> hybrid phototransistor with fast response rate and high on-off ratio. *Carbon* **92**, 126-132 (2015).

- [27] Kang, D. H. et al. High-performance transition metal dichalcogenide photodetectors enhanced by self-assembled monolayer doping. *Adv. Funct. Mater.* **25**, 4219-4227 (2015).
- [28] Li, S. et al. Enhanced performance of a CVD MoS<sub>2</sub> photodetector by chemical in situ n-type doping. *ACS Appl. Mater. interfaces* **11**, 11636-11644 (2019).
- [29] Xie, Y. et al. Ultrabroadband MoS<sub>2</sub> photodetector with spectral response from 445 to 2717 nm. *Adv. Mater.* **29**, 1605972 (2017).
- [30] Kwon, J., Hong, Y. K., Han, G., Omkaram, I., Choi, W., Kim, S., Yoon, Y. Giant Photoamplification in Indirect-Bandgap Multilayer MoS<sub>2</sub> Phototransistors with Local Bottom-Gate Structures. *Adv. Mater.* **27**, 2224-2230 (2015).
- [31] Kufer, D., Konstantatos, G. Highly sensitive, encapsulated MoS<sub>2</sub> photodetector with gate controllable gain and speed. *Nano Lett.* **15**, 7307-7313 (2015).
- [32] Wang, X. et al. Ultrasensitive and broadband MoS<sub>2</sub> photodetector driven by ferroelectrics. *Adv. Mater.* **27**, 6575-6581 (2015).
- [33] Pak, Y. et al. Enhanced Performance of MoS<sub>2</sub> Photodetectors by Inserting an ALD-Processed TiO<sub>2</sub> Interlayer. *Small* **14**, 1703176 (2018).
